# Supplementary material for: Metabolic specialization and synergy in alkane degradation by a microbial consortium: an integrated genomic and geochemical approach
Source: Research Square preprint supplement (doi:10.21203/rs.3.rs-8481249/v1), 2026-01-13
Supplement: Supplementary file 1 [file fe74f8cd15699ede3fe092ce.pdf]

## **Highlights**

- Microbial consortia efficiently degrade long-chain n-alkanes
- Key strains identified for crude oil biodegradation
- Degradation pathways involve fatty acid metabolism
- Promising approach for bioremediation of oil spills.
